# Supplementary material for: Analyzing the regional economic changes in a high-tech industrial development zone using machine learning algorithms
Source: PLOS journal article supplement (doi:10.1371/journal.pone.0250802), 2021-06-22
Supplement: S1 (10.1371/journal.pone.0250802.s001) [file journal.pone.0250802.s001]

## Sheet: Figure 2-4
												P1	P2	P3	P4	P5	P6
											Mean	52.88	246.39	157.92	205.62	246.19	42.39
											Standard deviation	376.39	286.35	110.32	198.75	687.19	229.92
											Mix	4604.76	2553.85	913.15	1837.93	9782.46	2482.61
											Max	0.08	15.98	19.13	12.12	7.48	0.06
												F1	F2	F3	F4	F5	All
											Mean	66678.7	48.75	0.12	0.38	0.02	0.73
											Standard deviation	34316.4	9.89	0.11	0.22	0.01	0.16
											Mix	12978	18.57	0.01	0.02	0.01	0.23
											Max	199017	85.08	0.42	0.75	0.05	1
												Estimated value	SD	Z	P
											F1	0.072	0.001	0.12	0.09
											F2	0.017	0.001	0.06	0.004
											F3	0.135	0.131	0.03	0.003
											F4	0.056	0.035	0.42	0.157
											F5	0.219	0.678	0.08	0.001

## Sheet: Figure 5-8
		2010	2011	2012	2013	2014	2015	2016	2017	2018	2019
	B1	0.552	0.519	0.685	0.235	0.635	0.587	0.598	0.64	0.674	0.674	0.5799	B1
	B2	0.532	0.645	0.645	0.592	0.356	0.662	0.65	0.703	0.764	0.768	0.6317	B2
	B3	0.649	0.634	0.65	0.872	0.702	0.89	0.521	0.537	0.578	0.569	0.6602	B3
	B4	0.843	0.589	0.596	0.584	0.595	0.603	0.633	0.62	0.89	0.86	0.6813	B4
	C1	0.607	0.716	0.797	0.641	0.663	0.722	0.683	0.695	0.775	0.893	0.7192	C1
	C2	1	1	1	1	0.971	1	1	1	0.917	0.867	0.9755	C2
	C3	0.752	0.688	0.726	0.661	0.733	0.643	0.548	0.502	0.493	0.629	0.6375	C3
	C4	0.675	0.73	0.772	0.655	0.0854	0.744	0.582	0.592	0.637	0.658	0.61304	C4
	D1	0.427	0.465	0.615	0.61	0.591	0.437	0.517	0.622	0.604	0.659	0.5547	D1
	D2	1	1	1	0.924	0.774	1	0.802	0.831	0.803	0.984	0.9118	D2
	D3	1	1	1	0.947	0.878	1	0.832	0.954	0.792	0.694	0.9097	D3
	D4	0.54	0.497	0.564	0.633	0.773	0.811	0.77	0.81	0.802	0.763	0.6963	D4
	E1	0.574	0.639	0.786	0.712	0.908	0.804	0.755	0.848	0.825	0.905	0.7756	E1
	E2	1	1	1	1	1	0.516	1	0.79	0.842	0.632	0.878	E2
	E3	0.755	0.804	0.908	0.742	0.682	0.657	1	0.732	1	1	0.828	E3
	E4	0.603	0.618	0.548	0.514	0.671	0.578	0.518	0.534	0.632	0.642	0.5858	E4
		B1	B2	B3	B4	C1	C2	C3	C4	D1	D2	D3	D4	E1	E2	E3	E4
	2010	1	0.547	0.71	0.858	0.774	1	0.88	0.6986	0.696	1	1	1	0.653	1	1	0.696
	2011	1	0.694	0.674	0.633	0.867	1	0.76	0.74	0.612	1	1	1	0.736	1	1	0.677
	2012	1	0.759	0.741	0.656	0.85	1	0.982	0.774	0.65	1	1	1	1	1	1	0.649
	2013	1	0.647	1	0.63	0.84	1	0.881	0.667	0.706	1	1	1	0.836	1	1	0.63
	2014	1	0.358	0.843	0.605	0.861	0.987	1	1	0.609	0.778	0.888	0.888	1	1	0.942	0.684
	2015	1	0.77	1	0.641	1	1	1	0.748	0.464	1	1	1	1	1	0.948	0.659
	2016	1	0.792	0.658	0.658	1	1	1	0.594	0.519	1	0.901	0.901	1	0.575	1	0.625
	2017	1	0.932	0.633	0.674	1	1	0.815	0.72	0.426	1	1	1	1	1	0.864	0.599
	2018	1	0.959	0.674	0.674	1	0.937	0.543	0.709	0.674	0.808	0.827	0.827	1	0.851	1	0.69
	2019	1	1	0.618	0.958	1	0.876	0.666	0.754	0.922	1	0.694	0.694	1	0.885	1	0.686
		1	0.7458	0.7551	0.6987	0.9192	0.98	0.8527	0.74046	0.6278	0.9586	0.931	0.931	0.9225	0.9311	0.9754	0.6595
		B1	B2	B3	B4	C1	C2	C3	C4	D1	D2	D3	D4	E1	E2	E3	E4
	2010	0.552	0.973	0.913	0.983	0.785	1	1	0.984	0.987	1	1	0.906	0.878	1	0.755	0.867
	2011	0.519	0.93	0.942	0.93	0.825	1	1	0.987	0.988	1	1	0.908	0.869	1	0.804	0.913
	2012	0.685	0.876	0.877	0.909	0.939	1	0.989	0.998	0.992	1	1	0.925	0.786	1	0.908	0.845
	2013	0.669	0.914	0.872	0.928	0.763	1	1	0.983	0.988	0.924	0.947	0.97	0.851	1	0.742	0.815
	2014	0.235	0.995	0.832	0.838	0.77	0.99	0.997	0.854	0.956	0.996	0.988	0.963	0.908	1	0.725	0.981
	2015	0.635	0.859	1	0.967	0.722	1	0.974	0.994	0.982	1	1	1	0.804	0.898	0.693	0.878
	2016	0.587	0.82	0.791	0.826	0.683	1	0.981	0.979	0.989	0.802	0.923	0.996	0.755	1	1	0.829
	2017	0.598	0.755	0.848	0.757	0.695	1	0.997	0.822	0.972	0.831	0.958	0.971	0.848	0.929	0.847	0.891
	2018	0.64	0.796	0.858	0.847	0.775	0.987	0.94	0.898	0.996	0.994	0.998	0.982	0.825	0.951	1	0.917
	2019	0.674	0.768	0.922	0.854	0.893	0.99	0.968	0.872	0.973	0.984	0.945	0.996	0.905	0.957	1	0.936
		2010	2011	2012	2013	2014	2015	2016	2017	2018	2019
	B1	0.552	0.519	0.685	0.669	0.235	0.635	0.587	0.598	0.64	0.674	0.5794
	B2	0.532	0.645	0.665	0.592	0.356	0.662	0.65	0.703	0.764	0.768	0.6337
	B3	0.649	0.634	0.65	0.872	0.702	1.076	0.521	0.537	0.578	0.569	0.6788
	B4	0.843	0.589	0.596	0.584	0.595	0.603	0.633	0.62	0.632	0.89	0.6585
	C1	0.607	0.716	0.796	0.641	0.663	0.722	0.683	0.695	0.775	0.893	0.7191
	C2	1.178	1.394	1.534	1.348	0.971	1.332	1.061	1.734	0.917	0.867	1.2336
	C3	0.752	0.688	0.726	0.661	0.733	0.643	0.548	0.502	0.493	0.629	0.6375
	C4	0.675	0.73	0.772	0.655	0.854	0.744	0.582	0.592	0.637	0.658	0.6899
	D1	0.427	0.465	0.615	0.61	0.591	0.437	0.517	0.622	0.604	0.659	0.5547
	D2	1.925	1.636	1.524	0.924	0.774	3.316	0.802	0.831	0.803	0.984	1.3519
	D3	1.48	1.453	1.089	0.947	0.878	1.326	0.832	0.954	0.792	0.694	1.0445
	D4	0.54	0.497	0.564	0.633	0.773	0.811	0.774	0.81	0.802	0.763	0.6967
	E1	0.574	0.639	0.786	0.712	0.908	0.804	0.755	0.848	0.825	0.905	0.7756
	E2	1	1.372	2.041	1.597	2.35	0.516	1	0.79	0.842	0.632	1.214
	E3	1	0.804	0.908	0.797	0.933	0.818	0.798	0.88	0.847	0.843	0.8628
	E4	0.603	0.618	0.548	0.514	0.671	0.578	0.518	0.534	0.632	0.642	0.5858

## Sheet: Figure 9-10
			Technical efficiency changes	Technical changes	Pure technical efficiency	Scale efficiency changes	Productivity index
		Northern region	0.994	1.008	1.096	0.998	1.017
		Southern region	1.023	1.027	1.021	1.033	1.061
		East area	1.006	1.011	1.008	0.998	1.046
		Western Region	0.922	1.003	0.914	1.019	1.052
			Technical efficiency changes	Technical changes	Pure technical efficiency	Scale efficiency changes	Productivity index
		2010-2011	0.981	1.014	0.968	1.013	0.994
		2011-2012	1.087	0.904	1.064	1.022	0.983
		2012-2013	0.967	1.116	0.993	0.974	1.079
		2013-2014	1.193	0.972	1.19	0.982	1.184
		2014-2015	0.992	0.576	1.006	0.986	0.972
		2015-2016	0.977	0.975	0.997	0.98	0.953
		2016-2017	0.964	1.073	0.984	0.916	1.083
		2017-2018	1.046	0.925	1.022	1.023	0.967
		2018-2019	1.044	0.914	1.027	1.016	0.955
		Avarge	1.007	1.01	1.005	1.001	1.047
				Avarge
			Technical efficiency changes	1.007
			Technical changes	1.01
			Pure technical efficiency	1.005
			Scale efficiency changes	1.001
			Productivity index	1.047
